# Supplementary material for: Dietary carbohydrates regulate intestinal colonization and dissemination of Klebsiella pneumoniae
Source: JCI journal article supplement (doi:10.1172/jci174726), 2024-03-21
Supplement: sd1 [file 1]

## Supplemental Material

**Supplemental Table 1. Resources.**

| REAGENT or RESOURCE                    | SOURCE            | IDENTIFIER       |
|----------------------------------------|-------------------|------------------|
| <b>Bacterial strains</b>               |                   |                  |
| <i>Klebsiella pneumoniae</i> MGH 78578 | ATCC              | 700721           |
| <i>K. pneumoniae</i> $\Delta$ urease   | This study        | NA               |
| <i>K. pneumoniae</i> $\Delta$ nrC      | This study        | NA               |
| <b>Biological samples</b>              |                   |                  |
| Human fecal samples                    | FARMM study       | NA               |
| <b>Chemicals</b>                       |                   |                  |
| Kanamycin Sulfate                      | Fisher            | BP906            |
| Vancomycin Hydrochloride               | Fresenius Kabi    | NDC 63323-314-61 |
| Neomycin Trisulfate Salt Hydrate       | Sigma             | N6386            |
| Hygromycin B                           | Corning           | 30-240-CR        |
| Apramycin Sulfate                      | Alfa Aesar        | J66616           |
| Polyethylene Glycol 3350               | Miralax           | NA               |
| Dextran Sulfate, Sodium Salt           | Fisher            | BP1585           |
| Lactulose                              | Thermo Scientific | J60160.22        |
| 10% Buffered Formalin Phosphate        | Fisher            | SF100-4          |
| Phenotype Microarrays                  | Biolog            | PM1, PM2A, PM3B  |
| <b>Critical commercial assays</b>      |                   |                  |
| Quantichrom Urea Assay Kit             | BioAssay Systems  | 76237-110        |
| Hemoccult Assay                        | Beckman Coulter   | 60151            |
| <b>Deposited data</b>                  |                   |                  |
| FARMM Shotgun Metagenomics             | FARMM study (33)  | PRJNA675301      |

| <b>Experimental models: Organisms/strains</b> |                             |       |
|-----------------------------------------------|-----------------------------|-------|
| C57Bl/6J                                      | Jackson Laboratory          | NA    |
| <b>Plasmids</b>                               |                             |       |
| pMDIAI                                        | Addgene                     | 51655 |
| pFLP-hyg                                      | Huang, T <i>et al.</i> (67) | NA    |
| pACBSR-hyg                                    | Huang, T <i>et al.</i> (67) | NA    |
| <b>Software and algorithms</b>                |                             |       |
| Prism 9.5.1                                   | GraphPad                    | NA    |

**Supplemental Table 2. Oligonucleotides.**

| <b>Name</b>          | <b>Function</b>                             | <b>Sequence</b>                                                                        |
|----------------------|---------------------------------------------|----------------------------------------------------------------------------------------|
| Kp-NtrC-LRed-F       | <i>ntrC</i> deletion<br>Recombineering      | GCCGGGTCATACCGAATTTTCGGTATACCTGCCTATTCGG<br>AAGTAGAGGTGTTTatgCAAgggatccgtcgacctgcagttc |
| Kp-NtrC-LRed-R       | <i>ntrC</i> deletion<br>Recombineering      | ACAAAATAGCAGCACTTTGCGCCGATCGGCTATTTTTCATC<br>ATGCTGTTGAACCctaCTCatgtgtaggctggagctgcttc |
| Kp-UreaseOp-LRed-F   | Urease operon<br>deletion<br>Recombineering | TACGGATGACATAAGCGTTTTCGTATGACCGGGATAAACTC<br>CCGCCGATCAATACTCATTGattccggggatccgtcgacc  |
| Kp-UreaseOp-LRed-R   | Urease operon<br>deletion<br>Recombineering | AGAGAGAGCAGAGGCTGCACCATCCGGACGCGCTTGCGC<br>CCGGCTGGTGCAACAGGCCTAatgtgtaggctggagctgcttc |
| Kp-NtrC-Check-F      | <i>ntrC</i> deletion test                   | GCACCGCTTTCCAGCTGACGC                                                                  |
| Kp-NtrC-Check-R      | <i>ntrC</i> deletion test                   | CCCGAATGCAGCAGTTCTCACGGG                                                               |
| Kp-UreaseOp-Check-F2 | Urease operon<br>deletion Test              | CAATACGTTAGCAGCATGGAAAGGCCAAAAGTTGC                                                    |
| Kp-UreaseOp-Check-R  | Urease operon<br>deletion Test              | GCGGGGCGTAACGTAAGGTGTAATCT                                                             |

**Supplemental Table 3. Disease Activity Index.**

| <b>Score</b> | <b>Weight Loss (%)</b> | <b>Stool Consistency</b> | <b>Rectal Bleeding</b> |
|--------------|------------------------|--------------------------|------------------------|
| 0            | <1                     | Normal                   | None                   |
| 1            | 1-5                    |                          |                        |
| 2            | 5-10                   | Loose Stool              | Hemoccult Positive     |
| 3            | 10-20                  |                          |                        |
| 4            | >20                    | Diarrhea                 | Gross Bleeding         |

**Supplemental Table 4. DSS Inflammation Scoring System.**

|                                          |                                                                                                                                                                                                                                     |           |
|------------------------------------------|-------------------------------------------------------------------------------------------------------------------------------------------------------------------------------------------------------------------------------------|-----------|
| <b>DSS/Mucosal/Crypt Loss:</b>           | Normal mucosa                                                                                                                                                                                                                       | 0         |
|                                          | Shortening of basal one-third of crypts +/- slight inflammation and edema in lamina propria.                                                                                                                                        | 1         |
|                                          | Loss of basal two-thirds of crypts +/- moderate inflammation in lamina propria.                                                                                                                                                     | 2         |
|                                          | Loss of all epithelium +/- severe inflammation in lamina propria +/- submucosa inflammation but with surface epithelium still remaining.                                                                                            | 3         |
|                                          | Loss of all epithelium, including surface epithelium +/- severe inflammation in the lamina propria and submucosa +/- muscularis. An exudate containing cell debris, inflammatory cells, fibrin and mucus covers the damaged mucosa. | 4         |
| <b>Crypt Inflammation:</b>               | Normal                                                                                                                                                                                                                              | 0         |
|                                          | 1-2 inflammatory cells                                                                                                                                                                                                              | 1         |
|                                          | Cryptitis                                                                                                                                                                                                                           | 2         |
|                                          | Crypt abscess/dirty necrosis                                                                                                                                                                                                        | 3         |
| <b>Lamina Propria Mononuclear Cells:</b> | Normal                                                                                                                                                                                                                              | 0         |
|                                          | Slight increase                                                                                                                                                                                                                     | 1         |
|                                          | Moderate increase                                                                                                                                                                                                                   | 2         |
|                                          | Marked increase                                                                                                                                                                                                                     | 3         |
| <b>Neutrophils:</b>                      | Normal                                                                                                                                                                                                                              | 0         |
|                                          | Slight increase                                                                                                                                                                                                                     | 1         |
|                                          | Moderate increase                                                                                                                                                                                                                   | 2         |
|                                          | Marked increase                                                                                                                                                                                                                     | 3         |
| <b>Epithelial hyperplasia:</b>           | Normal                                                                                                                                                                                                                              | 0         |
|                                          | Mild                                                                                                                                                                                                                                | 1         |
|                                          | Moderate increase                                                                                                                                                                                                                   | 2         |
|                                          | Discrete nest of regenerated crypts delineated from adjacent mucosa with no obvious disruption of overlying mucosal surface                                                                                                         | 3         |
| <b>Edema/fibrosis:</b>                   | None                                                                                                                                                                                                                                | 0         |
|                                          | Mild/focal/single layer of colon                                                                                                                                                                                                    | 1         |
|                                          | Moderate/multifocal/multiple layers                                                                                                                                                                                                 | 2         |
|                                          | Severe/widespread/transmural                                                                                                                                                                                                        | 3         |
| <b>Maximum Total:</b>                    |                                                                                                                                                                                                                                     | <b>19</b> |

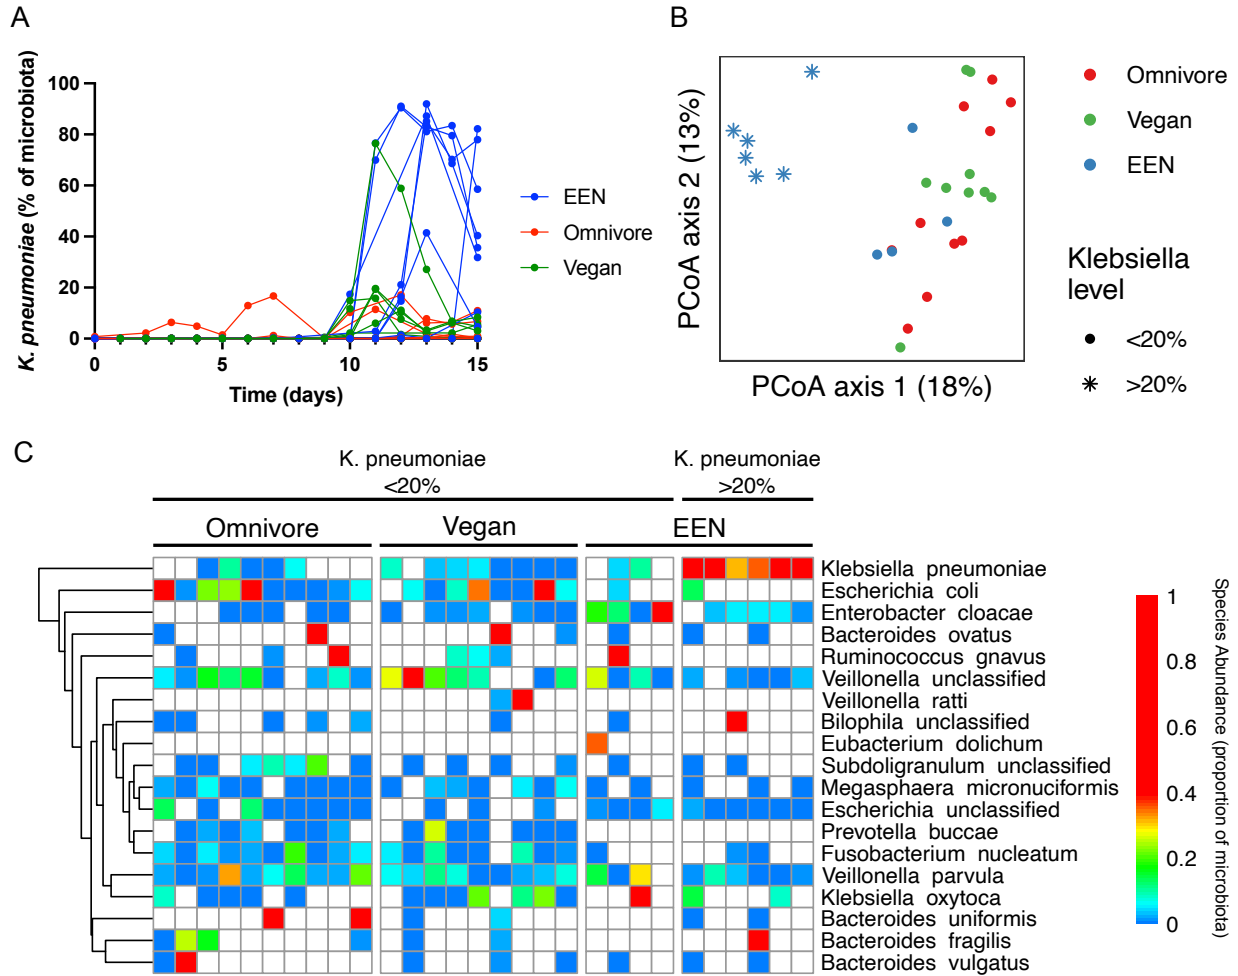

**Supplemental Figure 1. A.** Relative abundance of *K. pneumoniae* as a percentage of the microbiome determined via shotgun metagenomic sequencing, shown for each study subject, categorized by dietary group. This data is also presented in alternative graphical format in **Figure 1B**. **B.** PCoA plot of Bray-Curtis distances from each subject at Day 15 of the FARMM study. Dietary groups and *K. pneumoniae* high (>20%) and low (<20%) status are noted by color and symbol, respectively. **C.** Heat map of species abundance as determined by shotgun metagenomic sequencing of each subject, separated by dietary group and *K. pneumoniae* high or low categorization, from Day 15 of the FARMM study. n= 10 subjects per dietary group.

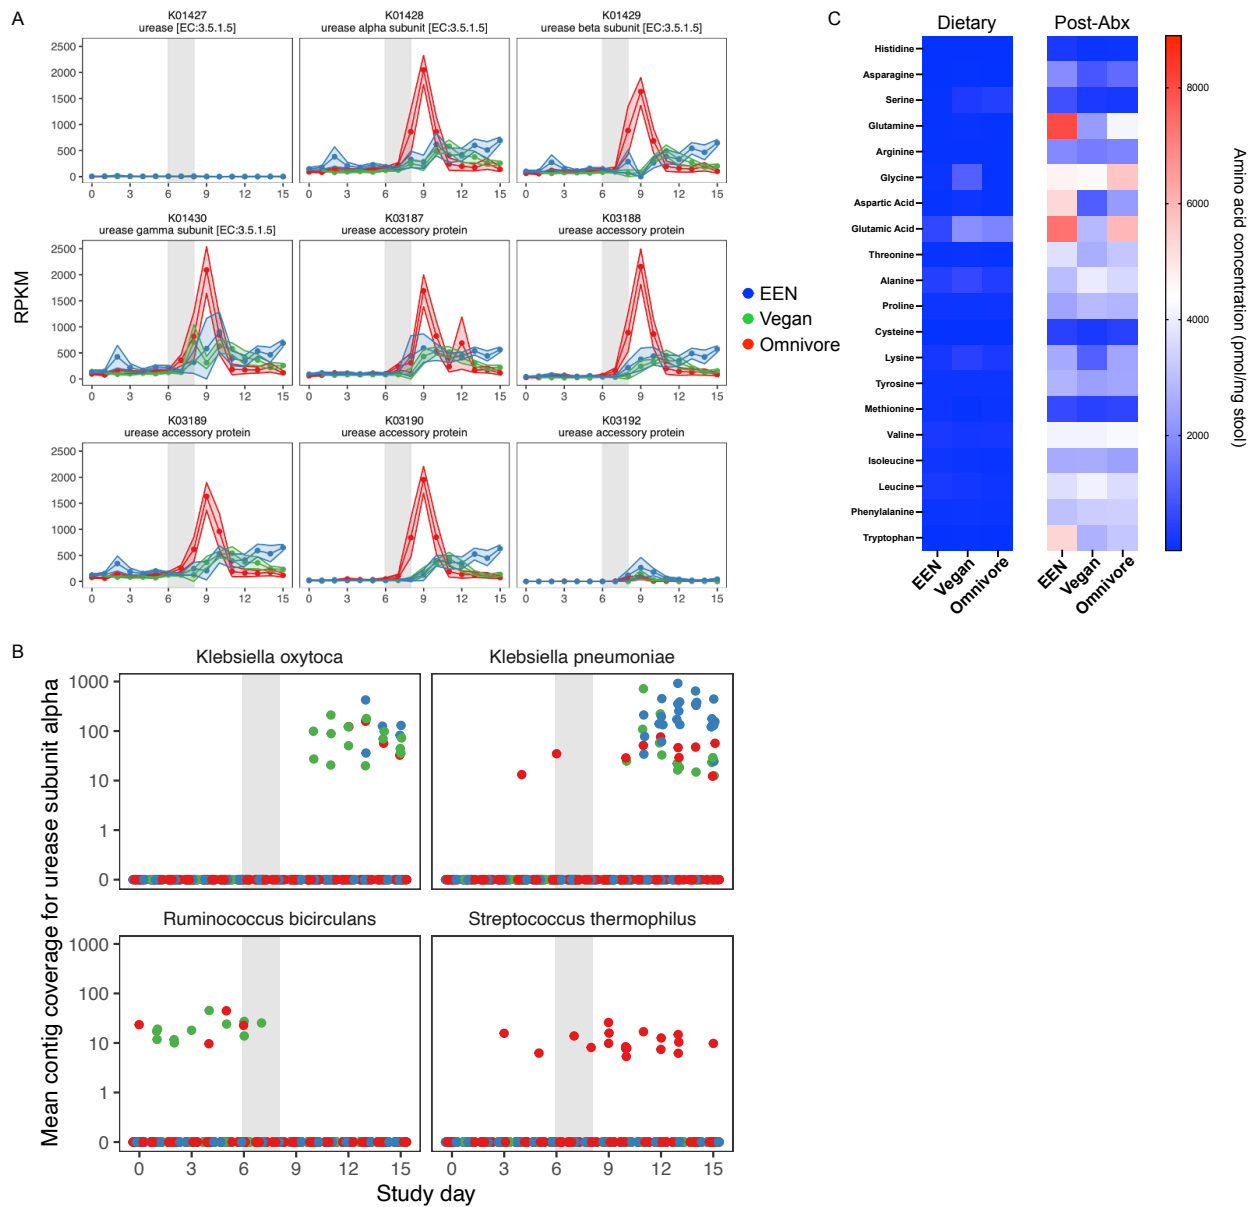

**Supplemental Figure 2. A.** Urease gene abundance corrected for gene length and sequencing depth determined from shotgun metagenomic sequencing, organized by diet and study day. **B.** Urease operon reconstruction from shotgun metagenomic sequencing, with contig coverage displayed by study day and diet (EEN blue, omnivore red, vegan green). **C.** Amino acid quantification from the FARMM study on days 5 (dietary) and 9 (post-abx), as determined by HPLC, organized by dietary group. Data displayed as mean  $\pm$  SE (A). n=10 subjects per dietary group.

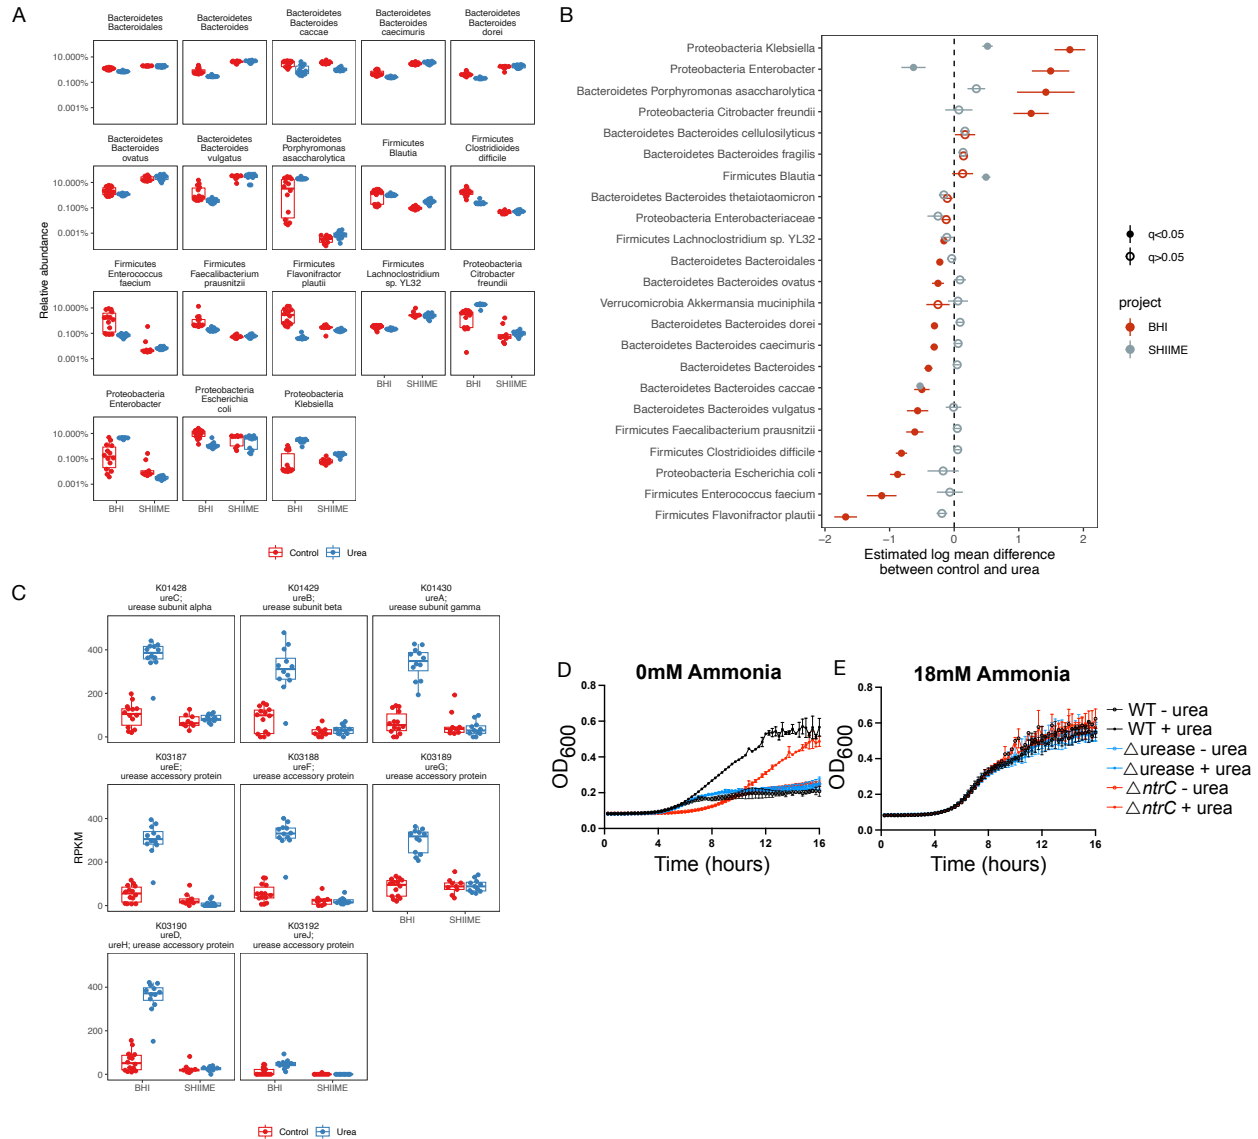

**Supplemental Figure 3. A-C.** A human fecal sample was inoculated into a bioreactor system with BHI media or SHIME media with or without urea supplementation. Serial samples were collected and subjected to shotgun metagenomic sequencing revealing differences in species abundance (**A-B**) and urease gene abundance (**C**). **D and E.** WT *K. pneumoniae* and isogenic mutants of the urease operon and *ntrC* gene grown in M9 minimal media with 0mM (**D**), 18mM (**E**) ammonia with or without 5mM urea supplementation. OD<sub>600</sub> was monitored during aerobic growth for 16 hours. Data presented as mean with quartiles noted by box and whisker plot (**A and C**), median and first and third quartiles (**B**), or mean  $\pm$  SD (**D and E**);  $n = 15$  time points per condition (**A-C**), or  $n = 2-3$  wells per condition (**D-E**). Data representative of three independent experiments (**D-E**). Results of linear model on log<sub>10</sub> transformed abundance.

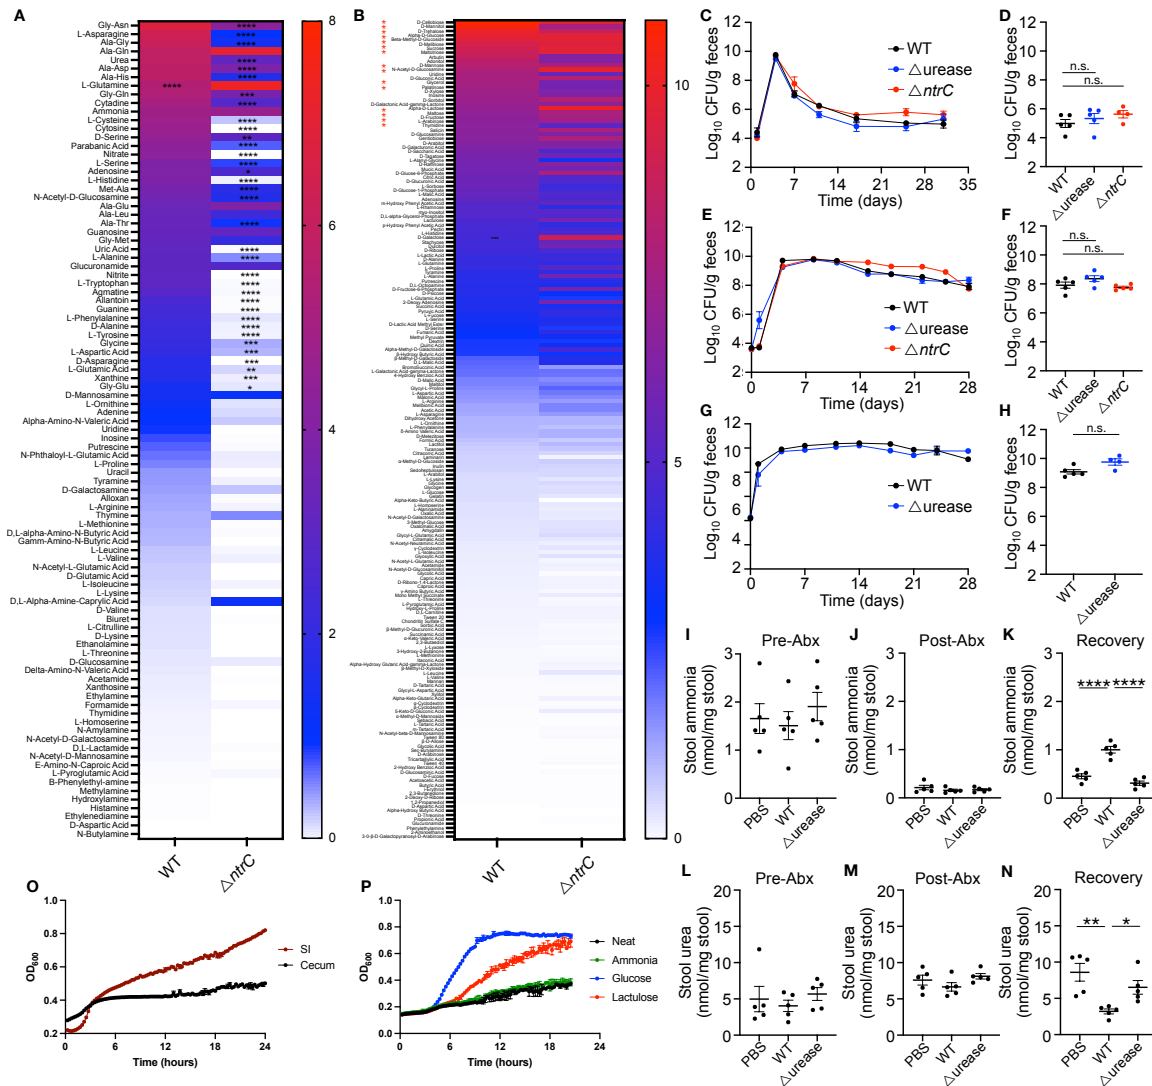

**Supplemental Figure 4. A and B.** WT and  $\Delta ntrC$  *K. pneumoniae* were grown in M9 minimal media with single nitrogen sources (A) or carbon sources (B) as indicated. Heat map represents area under the curve of OD<sub>600</sub> monitored during aerobic growth for 20 hours. Red asterisks denote simple or alcohol sugars in the top 25 listed compounds. **C-H.** Mice were provided a standard chow diet (C and D), a low protein diet (E and F), or a fiber free diet (G and H) and gavaged with WT,  $\Delta ntrC$ , or  $\Delta urease$  *K. pneumoniae* after abx pre-treatment and fecal CFU was monitored for the subsequent 4 weeks. (C, E, and G). CFU quantification 4 weeks after gavage for each respective diet (D, F, and H). **I-K.** Fecal ammonia was quantified in mice colonized with WT,  $\Delta ntrC$ , or  $\Delta urease$  *K. pneumoniae* before abx (I), after abx (J) and 3 days after gavage (K). **L-N.** Fecal urea was quantified in mice colonized with WT,  $\Delta ntrC$ , or  $\Delta urease$  *K. pneumoniae* before abx (L), after abx (M) and 3 days after gavage (N). **O and P.** Ex-vivo growth of *K. pneumoniae* in SI or cecal material (O) or in cecal material supplemented with ammonia, glucose, or lactulose (P) under anaerobic conditions. Data presented mean  $\pm$  SEM (C-P), n=4-5 mice per group (C-N), or n=3 wells per experiment (A, B, O, P). Data represents two to three independent experiments. Results of one-way ANOVA with Bonferroni correction for multiple comparisons (D, F, H, I-N) or multiple t-tests with Bonferroni correction (A, B), n.s., not significant, n.s., not significant, \*p<0.05, \*\*p<0.01, \*\*\*p<0.001, \*\*\*\*p<0.0001.

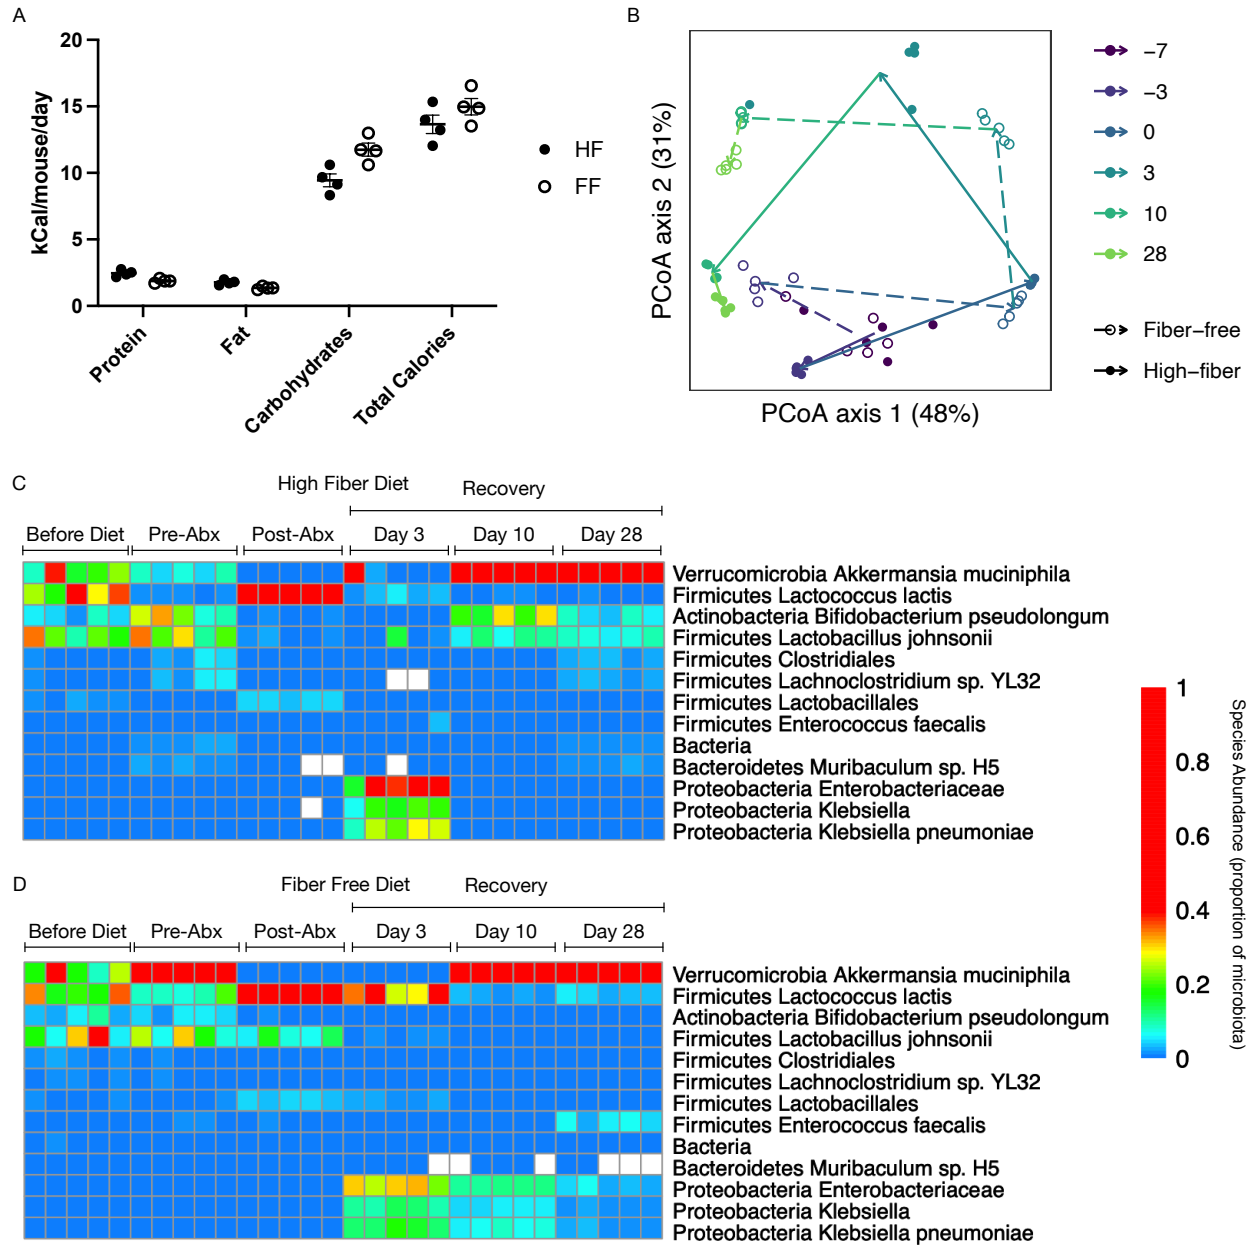

**Supplemental Figure 5. A-D.** Mice were provided a HF or FF diet, treated with antibiotics, and gavaged with *K. pneumoniae*. Calorie consumption of mice in HF and FF groups, organized by macronutrient (A). PCoA plot of Bray-Curtis distances from mouse shotgun metagenomic sequencing from HF and FF dietary groups over time, as denoted by color. Each mouse is indicated by a single point with lines and arrows connecting the centroids of consecutive timepoints of the study (B). Heat map of species abundance (C and D). Data presented as mean  $\pm$  SD, n=5 mice per group. Average daily calorie consumption of mice in a group of 5 per cage, over a week period, each data point representing one cage (A). Result of multiple unpaired t-tests, FDR 1% (A).



A

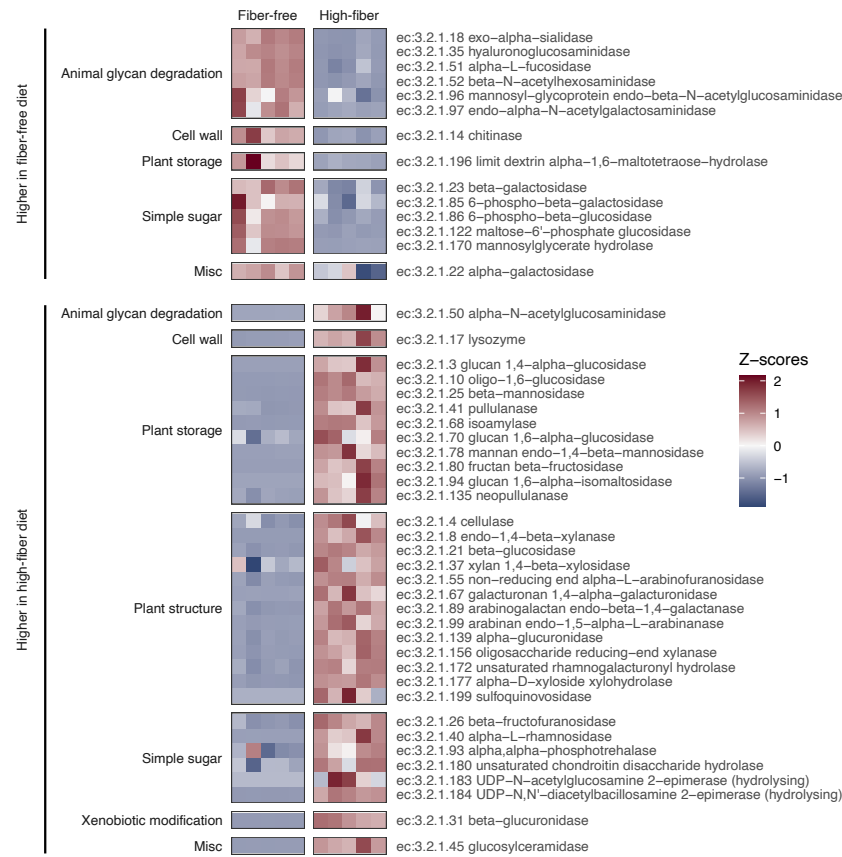

B

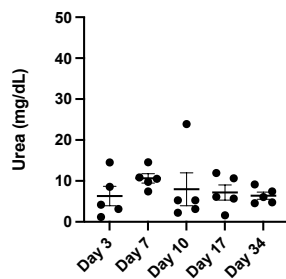

C

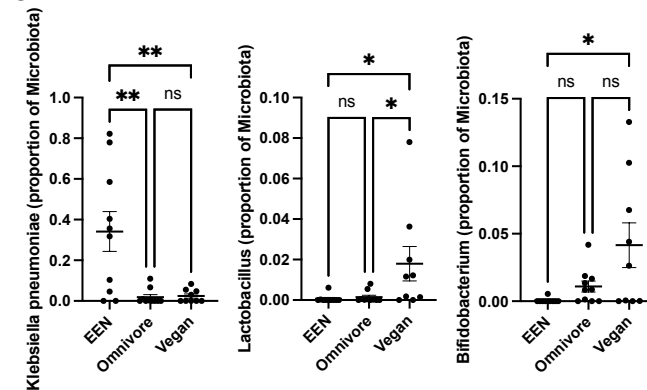

**Supplemental Figure 6 A-B.** Mice were provided a HF or FF diet, treated with antibiotics, and gavaged with *K. pneumoniae*. Z-scores of glycoside hydrolase abundance as determined by shotgun metagenomic sequencing over the course of the study period, with each mouse represented by a single column (A). Urea quantification from mice on a HF diet after *K. pneumoniae* gavage (B). C. Species abundance of *K. pneumoniae*, *Lactobacillus*, and *Bifidobacterium* from the FARMM trial shotgun metagenomic sequencing, organized by dietary group from day 15 of the study. Data presented as mean  $\pm$  SD (B and C), n=5 mice per group (A and B), n=10 subjects per dietary group (C). The *K. pneumoniae* data of C is a different graphical format of the data from Figure 1B. Results of one-way ANOVA with Tukey correction, n.s. not significant, \* $p < 0.05$ , \*\* $p < 0.01$  (B and C).
